# Supplementary material
Source: publisher figshare collection journal article supplement (https://brill.figshare.com/articles/dataset/_/12161874)
Supplement: Supplementary file 1 [file 1]

## Review

### Species list of the European herpetofauna – update by the Taxonomic Committee of the Societas Europaea Herpetologica

Jeroen Speybroeck<sup>1,\*</sup>, Wouter Beukema<sup>2</sup>, Christophe Dufresnes<sup>3</sup>, Uwe Fritz<sup>4</sup>, Daniel Jablonski<sup>5</sup>, Petros Lymberakis<sup>6</sup>, Iñigo Martínez-Solano<sup>7</sup>, Edoardo Razzetti<sup>8</sup>, Melita Vamberger<sup>4</sup>, Miguel Vences<sup>9</sup>, Judit Vörös<sup>10</sup>, Pierre-André Crochet<sup>11</sup>

1 - Research Institute for Nature and Forest, Havenlaan 88 bus 73, 1000 Brussel, Belgium

2 - Wildlife Health Ghent, Department of Pathology, Bacteriology and Avian Diseases, Ghent University, Salisburylaan 133, 9820 Merelbeke, Belgium

3 - LASER, College of Biology and the Environment, Nanjing Forestry University, Nanjing, China

4 - Museum of Zoology, Senckenberg Dresden, A.B. Meyer Building, Königsbrücker Landstraße 159, 01109 Dresden, Germany

5 - Department of Zoology, Comenius University in Bratislava, Ilkovičova 6, Mlynská dolina, 842 15 Bratislava, Slovakia

6 - Natural History Museum of Crete, University of Crete, Knossou Ave. 71409, Crete, Irakleio, Greece

7 - Museo Nacional de Ciencias Naturales (MNCN-CSIC), c/ José Gutiérrez Abascal, 2, 28006 Madrid, Spain

8 - Kosmos – Museo di Storia Naturale, Università di Pavia, Piazza Botta 9, 27100 Pavia, Italy

9 - Division of Evolutionary Biology, Zoological Institute, Braunschweig University of Technology, Mendelssohnstr. 4, 38106 Braunschweig, Germany

10 - Department of Zoology, Hungarian Natural History Museum, 1088 Budapest, Baross u. 13, Hungary

11 - CEFE, Université Montpellier, CNRS, EPHE, IRD, Université Paul Valéry Montpellier 3,  
Montpellier, France

\*Corresponding author; e-mail: jeroen.speybroeck@inbo.be

**Supplementary material**
